# Supplementary material for: Integrated analysis of phytochemical composition, pharmacokinetics, and network pharmacology to probe distinctions between the stems ofCistanche deserticolaandC. tubulosabased on antidepressant activity
Source: Royal Society of Chemistry journal article supplement (doi:10.1039/d2fo01357f), 2022-01-01
Supplement: d2fo01357f1.pdf [file d2fo01357f1.pdf]

## Supporting Information

### **Integrated analysis of phytochemical composition, pharmacokinetics and network pharmacology to probe the distinctions between the stems of *Cistanche deserticola* and *C. tubulosa* based on antidepressant activity**

Li Fan, Ying Peng, Xiaonan Chen, Ping Ma, Xiaobo Li\*

School of Pharmacy, Shanghai Jiao Tong University, 800 Dongchuan Road, Shanghai 200240, P. R. China

#### **\*Corresponding author**

Xiaobo Li, School of Pharmacy, Shanghai Jiao Tong University, 800 Dongchuan Road, Shanghai 200240, People's Republic of China; Tel.: +86-21-3420-4806; Fax: +86-21-3420-4804.

E-mail: [xbli@sjtu.edu.cn](mailto:xbli@sjtu.edu.cn) (X.B. Li)

## Methods

### *Relative contents of glycosides and carbohydrates in Cistanche deserticola and C. tubulosa aqueous extracts*

*Cistanche deserticola* aqueous extract (CDE) and *C. tubulosa* aqueous extract (CTE) were slowly stirred with ethanol (1:4, v/v) and placed at 4°C for 24 h, respectively. Then, the precipitate and supernatant were collected by centrifugation at 4000 r/min for 20 min. The relative contents of total polysaccharides in CTE and CDE were determined from the collected precipitate by phenol-sulfuric acid colorimetric method with glucose as the standard. The remaining supernatant was then chromatographed over a D101 microporous resin column and eluted with distilled water. The relative contents of total oligosaccharides in CTE and CDE were determined from the collected eluents by phenol-sulfuric acid colorimetric method with glucose as the standard. And the relative contents of total glycosides in CTE and CDE were determined by UV-Vis spectrophotometry at 330 nm using echinacoside as the standard.

### *Chemical analysis by UPLC-QTOF-MS/MS analysis*

The chromatographic separation was performed on an Agilent 1290 UPLC system (Agilent Ltd., USA) with an Agilent

ZORBAX Eclipse Plus C<sub>18</sub> column (100 mm×2.1 mm i.d., 1.8 μm, Agilent Ltd., USA). The mobile phase consisted of 0.1% formic acid–water (v/v, mobile phase A) and 0.1% formic acid–acetonitrile (v/v, mobile phase B), and the gradient elution program at flow rate of 0.4 mL/min was as follows: mobile phase A at 95%A (0–4.00 min), from 95% to 80% (4.00–14.00 min), from 80% to 60% (14.00–17.00 min), from 60% to 5% (17–19 min) and maintaining at 5% (19.00–20.50 min). The temperature of column and autosampler was controlled at 35 °C and 4 °C, respectively. The injection volume was 5 μL. An Agilent G6545 QTOF mass spectrometer (Agilent Ltd., USA) equipped with electro spray ionization (ESI) source was operated in negative ionization mode. The mass spectrometer parameters were as follows: Gas Temp, 320 °C; Gas Flow, 8L/min; nebulizer, 35 psig; Sheath Gas Temp, 350 °C; Sheath Gas Flow, 11 L/min; VCap, 3500 V; Nozzle Voltage, 1000 V; Fragmentor, 175 V; Skimmer, 65 V; OCT1 RF Vpp, 750 V. Auto MS/MS mode was used to collect the data.

#### *Chemical analysis by UPLC-QTRAP-MS/MS analysis*

The analysis was performed in a SHIMADZU LC–20A UFLC system with an Applied Biosystem 5500 QTRAP hybrid triple-quadrupole mass spectrometer (Applied Biosystems/MDS Sciex, CA, USA), equipped with a turbo ion spray source. Chromatographic separation was performed on a ZORBAX Eclipse Plus C<sub>18</sub> column (100 mm × 2.1 mm, 1.8 μm). The mobile phase consisted of 0.1% formic acid–water (v/v, mobile phase A) and 0.1% formic acid–acetonitrile (v/v, mobile phase B) and the gradient elution program at flow rate of 0.4 mL/min was as follows: mobile phase A at 95%~90% A (0–2.00 min), from 90% to 60% (2.00–7.00 min), from 60% to 5% (7.00–9.00 min), and maintaining at 5% (9.00–10.50 min). The column temperature and injection volume were set at 40°C and 1 μL, respectively. An MS system operating in the negative electrospray ionization mode was employed in this study. Quantification was performed a multiple reaction monitoring (MRM) model of the transition and the parameters were as follows: TIS temperature, 550 °C; ionspray voltage, -4500 V; curtain gas, 25 L·min<sup>-1</sup>; Gas 1, 50 L·min<sup>-1</sup>; Gas 2, 50 L·min<sup>-1</sup>. The quantitative ion pairs of the measured compounds and corresponding DP and CE values are shown in Table S1. The sample data were collected and processed by Analyst 1.6.1 software (AB SCIEX, Concord, Canada). The method was validated for selectivity, linearity, lower limit of quantification, accuracy, precision, extraction recovery, matrix effect and stability according to the US Food and Drug Administration Bio-analytical Method Validation Guide.

**Table S1** Mass spectrometry information of the measured compounds

| Compounds                              | MRM (Da)     | DP (eV) | CE (eV) |
|----------------------------------------|--------------|---------|---------|
| Echinacoside                           | 785.3>623.0  | −41     | −51     |
| Geniposide acid                        | 373.2>211.1  | −72     | −14     |
| 8-Epiloganic acid                      | 375.3>213.1  | −130    | −22     |
| Verbascoside                           | 623.4>160.9  | −46     | −39     |
| Isoverbascoside                        | 623.4>461.4  | −40     | −40     |
| 2'-Acetylverbsacoside                  | 665.2>623.7. | −74     | −40     |
| Campneoside II                         | 639.2>621.2  | −40     | −30     |
| Tubuloside B                           | 665.3>461.3  | −50     | −45     |
| Cistanoside A                          | 799.2>623.0  | −50     | −47     |
| caffeic acid                           | 179.0>117.0  | −55     | −34     |
| 3,4-dihydroxyphenyl-<br>propionic acid | 181.1>109.0  | −50     | −20     |
| 3-hydroxyphenylpropionic<br>acid       | 165.1>106.0  | −48     | −32     |
| hydroxytyrosol                         | 153.2>122.1  | −46     | −30     |

#### *Western blot analysis*

The total protein from the PC12 cells and hippocampus were extracted and determined by BCA method. Equal amount of protein was separated on SDS-PAGE (10 mL 10% separation gel containing 2.7 mL H<sub>2</sub>O, 3.3 mL 30% Acr-Bis, 3.8mL 1M Tris-HCl (pH 8.8), 0.1 mL 10% SDS, 0.1 mL 10% ammonium persulfate, and 0.004 mL tetramethylethylenediamine (TEMED)) and then transferred to PVDF membranes. After blocking with 5% BSA for 2 h, the membranes were incubated overnight at 4°C with AKT, p-AKT, GSK3 $\beta$ , p-GSK3 $\beta$  and cleaved caspase 3 antibody. Then the membranes were incubated at room temperature for 2 h in buffer containing anti-rabbit IgG. For the densitometry analysis, images were detected with Image J software.

#### *Behavioral despair tests in mice*

Open field test: The locomotion activities were evaluated by recording the total distance and rearing number using a video-tracking system (Shanghai Mobile Datum Information Technology Co., Ltd.), which was performed 30 min after

injection of each compound. Each animal was measured for 5 min.

Tail suspension test: After injection of each compound for 30 min, the mice were fixed on a Tail Suspension Monitor at a distance of 2 cm from the tail tip, which was in a suspended state and the head was more than 10 cm from the ground. After 2 min adaption, the immobility time was recorded for 4 min. The criteria of immobility was that the mice stopped struggling and kept vertically suspended.

Forced swimming test: After injection of each compound for 30 min, the mice were placed in an organic glass drum filled with water (temperature:  $23 \pm 2$  °C). All mice were allowed to swim freely for 6 min, and the duration of immobility in the last 4 min was recorded. Each mouse was judged to be immobile when it stopped struggling, remained floating motionless in water, and only made those movements necessary to keep its head above water.

## **Results**

### *The parameters of OPLS–DA analysis*

The model parameters (R<sup>2</sup><sub>Y</sub> and Q<sup>2</sup>) of OPLS-DA analysis were 0.999 and 0.998, respectively. The parameters were both greater than 0.9 and the difference between them was less than 0.3, indicating that the model had good fitting degree and prediction. Permutation test was used to perform external verification on the model by replacing Y classification labels 200 times randomly, and the results showed that the R<sup>2</sup> and Q<sup>2</sup> were 0.432 and -0.09089, respectively, indicating there was no over-fitting phenotype in the model.

**Table S2.** Characterization of chemical constituents in *C. deserticola* and *C. tubulosa* aqueous extracts by UPLC–QTOF–MS/MS

| No. | t <sub>R</sub> (min) | Measured Mass<br>(Da) | Error<br>(mDa) | Formula                                         | MS/MS fragment ions (Da)                         | Identification                        | Source  |
|-----|----------------------|-----------------------|----------------|-------------------------------------------------|--------------------------------------------------|---------------------------------------|---------|
| 1   | 0.593                | 181.0712              | 0.56           | C <sub>6</sub> H <sub>14</sub> O <sub>6</sub>   | 101.0242, 146.8687                               | mannitol*                             | CDE/CTE |
| 2   | 1.832                | 373.1138              | 0.22           | C <sub>16</sub> H <sub>22</sub> O <sub>10</sub> | 123.0451, 193.0503                               | geniposidic acid isomer               | CDE/CTE |
| 3   | 2.717                | 373.1138              | 0.22           | C <sub>16</sub> H <sub>22</sub> O <sub>10</sub> | 123.0451, 167.0708, 211.0613                     | geniposidic acid*                     | CDE/CTE |
| 4   | 4.487                | 375.1292              | 0.47           | C <sub>16</sub> H <sub>21</sub> O <sub>10</sub> | 151.0754, 169.0867, 213.0762                     | 8–epiloganic acid isomer              | CDE/CTE |
| 5   | 5.195                | 461.1661              | 0.35           | C <sub>20</sub> H <sub>30</sub> O <sub>12</sub> | 161.0447, 315.1080, 461.1663                     | decaffeoylverbascoside*               | CDE/CTE |
| 6   | 5.253                | 345.1188              | 0.31           | C <sub>15</sub> H <sub>22</sub> O <sub>9</sub>  | 299.1146                                         | 6–deoxycatalpol*                      | CDE/CTE |
| 7   | 5.311                | 299.1133              | 0.33           | C <sub>14</sub> H <sub>20</sub> O <sub>7</sub>  | 119.0498                                         | salidroside*                          | CDE/CTE |
| 8   | 5.549                | 375.1294              | 0.27           | C <sub>16</sub> H <sub>24</sub> O <sub>10</sub> | 151.0763, 169.0865, 213.0764                     | 8–epiloganic acid*                    | CDE/CTE |
| 9   | 5.73                 | 649.1989              | -0.36          | C <sub>27</sub> H <sub>38</sub> O <sub>18</sub> | 135.0445, 179.0349, 305.0882, 485.1283           | kankanose                             | CDE/CTE |
| 10  | 7.083                | 375.1293              | 0.37           | C <sub>16</sub> H <sub>24</sub> O <sub>10</sub> | 365.1002                                         | adoxosidic acid                       | CDE/CTE |
| 11  | 7.496                | 331.1395              | 0.34           | C <sub>15</sub> H <sub>24</sub> O <sub>8</sub>  | 161.0446                                         | glucoside                             | CDE/CTE |
| 12  | 8.381                | 475.1815              | 0.6            | C <sub>21</sub> H <sub>32</sub> O <sub>12</sub> | 113.0240, 161.0445, 329.0769                     | cistanoside E                         | CDE     |
| 13  | 8.617                | 487.1462              | -0.49          | C <sub>21</sub> H <sub>28</sub> O <sub>13</sub> | 179.0352, 251.0559, 305.0665, 323.0769           | cistanoside F                         | CDE/CTE |
| 14  | 9.148                | 487.1454              | 0.31           | C <sub>21</sub> H <sub>28</sub> O <sub>13</sub> | 179.0342, 251.0557, 305.0660, 323.0768           | cistanoside F isomer                  | CDE/CTE |
| 15  | 9.973                | 503.1769              | 0.11           | C <sub>22</sub> H <sub>32</sub> O <sub>13</sub> | 135.0445, 161.0452, 315.1077, 443.1543, 461.1663 | cistanoside H                         | CDE/CTE |
| 16  | 10.268               | 801.2454              | 0.48           | C <sub>35</sub> H <sub>46</sub> O <sub>21</sub> | 179.0352, 325.0934, 621.2053, 691.2107           | cistantubuloside C1/C2                | CDE/CTE |
| 17  | 10.386               | 521.2021              | 0.74           | C <sub>26</sub> H <sub>34</sub> O <sub>11</sub> | 359.1489                                         | lariciresinol–4–O–β–D–glucopyranoside | CDE     |

|    |        |          |       |                                                 |                                                                      |                                                 |         |
|----|--------|----------|-------|-------------------------------------------------|----------------------------------------------------------------------|-------------------------------------------------|---------|
|    |        |          |       |                                                 |                                                                      | or isomer                                       |         |
| 18 | 11.688 | 639.1939 | -0.84 | C <sub>29</sub> H <sub>36</sub> O <sub>16</sub> | 621.1802                                                             | campneoside II or isomer                        | CDE/CTE |
| 19 | 11.979 | 785.2514 | -0.43 | C <sub>35</sub> H <sub>46</sub> O <sub>20</sub> | 161.0240, 179.0346, 461.1655, 477.1613, 623.2189                     | echinacoside*                                   | CDE/CTE |
| 20 | 12.451 | 521.2023 | 0.54  | C <sub>26</sub> H <sub>34</sub> O <sub>11</sub> | 329.1389, 359.1390                                                   | lariciresinol-4-O-β-D-glucopyranoside or isomer | CDE     |
| 21 | 12.573 | 639.1943 | -1.24 | C <sub>29</sub> H <sub>36</sub> O <sub>16</sub> | 113.0242, 161.0248, 251.0560, 305.0663, 323.0771, 529.1562, 621.1828 | campneoside II*                                 | CDE/CTE |
| 22 | 13.041 | 769.2560 | 0.05  | C <sub>35</sub> H <sub>46</sub> O <sub>19</sub> | 145.0291, 457.1524, 477.1619, 605.2098, 623.2187                     | poliumoside*                                    | CDE/CTE |
| 23 | 13.222 | 785.2504 | 0.57  | C <sub>35</sub> H <sub>46</sub> O <sub>20</sub> | 161.0239, 477.1613, 623.2190                                         | echinacoside isomer                             | CDE/CTE |
| 24 | 13.277 | 799.2660 | 0.62  | C <sub>36</sub> H <sub>48</sub> O <sub>20</sub> | 161.0240, 475.1804, 491.1756, 623.2186, 637.2336                     | cistanoside A*                                  | CDE/CTE |
| 25 | 13.336 | 345.1553 | 0.19  | C <sub>29</sub> H <sub>34</sub> O <sub>15</sub> | 153.0915, 165.0912, 183.1010                                         | kankanoside A or isomer                         | CDE/CTE |
| 26 | 13.513 | 345.1553 | 0.19  | C <sub>16</sub> H <sub>26</sub> O <sub>8</sub>  | 153.0915, 165.0912, 183.1010                                         | kankanoside A or isomer                         | CDE/CTE |
| 27 | 13.749 | 347.1708 | 0.34  | C <sub>16</sub> H <sub>28</sub> O <sub>8</sub>  | 167.1072                                                             | kankanoside E or N or isomer                    | CDE/CTE |
| 28 | 14.103 | 623.1983 | -0.16 | C <sub>29</sub> H <sub>36</sub> O <sub>15</sub> | 161.0256, 179.0348, 315.1083, 461.1663                               | verbascoside*                                   | CDE/CTE |
| 29 | 14.457 | 799.2663 | 0.32  | C <sub>36</sub> H <sub>48</sub> O <sub>20</sub> | 161.0242, 637.2353                                                   | cistanoside A isomer                            | CDE     |
| 30 | 14.516 | 347.1715 | -0.36 | C <sub>16</sub> H <sub>28</sub> O <sub>8</sub>  | 161.0472, 303.1804                                                   | kankanoside E or N or isomer                    | CDE/CTE |
| 31 | 14.575 | 813.2818 | 0.47  | C <sub>37</sub> H <sub>50</sub> O <sub>20</sub> | 175.0403, 473.1661, 637.2346                                         | cistanoside B                                   | CDE     |
| 32 | 14.87  | 623.1979 | 0.24  | C <sub>29</sub> H <sub>36</sub> O <sub>15</sub> | 161.0251, 179.0350, 315.1043, 461.1618                               | Isoverbascoside*                                | CDE/CTE |

|    |        |          |       |                                                 |                                                            |                                                            |         |
|----|--------|----------|-------|-------------------------------------------------|------------------------------------------------------------|------------------------------------------------------------|---------|
| 33 | 14.988 | 769.2552 | 0.85  | C <sub>35</sub> H <sub>46</sub> O <sub>19</sub> | 161.0240, 607.2226                                         | cistantubuloside A                                         | CDE/CTE |
| 34 | 15.106 | 579.2079 | 0.41  | C <sub>28</sub> H <sub>36</sub> O <sub>13</sub> | 181.0506, 417.1540                                         | (+)-syringaresinol-O-β-D-glucopyranoside                   | CDE/CTE |
| 35 | 15.401 | 607.2033 | -0.07 | C <sub>29</sub> H <sub>36</sub> O <sub>14</sub> | 161.0244, 445.1716                                         | syringalide-A-3' -α-L-rhamnopyranoside                     | CDE/CTE |
| 36 | 15.46  | 841.2769 | 0.28  | C <sub>38</sub> H <sub>50</sub> O <sub>21</sub> | 161.0241, 491.1772                                         | cistanoside N or isomer                                    | CDE     |
| 37 | 15.578 | 637.2144 | -0.61 | C <sub>30</sub> H <sub>38</sub> O <sub>15</sub> | 161.0241, 179.0345, 475.1819                               | cistanoside C                                              | CDE/CTE |
| 38 | 15.582 | 753.2615 | -0.36 | C <sub>35</sub> H <sub>46</sub> O <sub>18</sub> | 161.0243, 179.0358                                         | kankanoside I                                              | CDE/CTE |
| 39 | 15.755 | 607.2033 | -0.07 | C <sub>29</sub> H <sub>36</sub> O <sub>14</sub> | 161.0244, 445.1724, 461.1446                               | isosyringalide-A-3' -α-L-rhamnopyranoside                  | CDE/CTE |
| 40 | 15.873 | 665.2092 | -0.49 | C <sub>31</sub> H <sub>38</sub> O <sub>16</sub> | 161.0255, 315.1088, 461.1666, 503.1775                     | 2' -acetylverbasocisde*                                    | CDE/CTE |
| 41 | 15.932 | 637.2144 | -0.61 | C <sub>30</sub> H <sub>38</sub> O <sub>15</sub> | 161.0244, 175.0403, 461.1655, 475.1826                     | cistanoside C or isomer                                    | CDE/CTE |
| 42 | 15.932 | 591.2088 | -0.49 | C <sub>29</sub> H <sub>36</sub> O <sub>13</sub> | 119.0498, 145.0294, 445.1695                               | osmanthuside B or B6 or isomer                             | CDE/CTE |
| 43 | 16.168 | 621.2184 | 0.48  | C <sub>30</sub> H <sub>38</sub> O <sub>14</sub> | 145.0293, 461.1634, 475.1826                               | cistanoside M or isomer                                    | CDE     |
| 44 | 16.227 | 445.1504 | 0.01  | C <sub>23</sub> H <sub>26</sub> O <sub>9</sub>  | 117.0341, 145.0296, 163.0401                               | eutigoside A                                               | CDE     |
| 45 | 16.286 | 665.2087 | 0.01  | C <sub>31</sub> H <sub>38</sub> O <sub>16</sub> | 161.0242, 315.1078, 461.1672, 503.1761                     | tubuloside B*                                              | CDE/CTE |
| 46 | 16.404 | 649.2141 | -0.31 | C <sub>31</sub> H <sub>38</sub> O <sub>15</sub> | 461.1621                                                   | salaside D or salaside F or tubuloside E or isomer         | CDE     |
| 47 | 16.463 | 665.2089 | -0.19 | C <sub>30</sub> H <sub>38</sub> O <sub>14</sub> | 161.0242, 315.1078, 443.6015, 461.1672, 503.1761, 623.1996 | tubuloside B isomer                                        | CDE/CTE |
| 48 | 16.581 | 679.2246 | -0.24 | C <sub>32</sub> H <sub>40</sub> O <sub>16</sub> | 161.0245, 475.1819, 637.2132                               | salaside D or cistanoside K or cistansinenside A or isomer | CDE     |
| 49 | 16.64  | 651.2299 | -0.46 | C <sub>31</sub> H <sub>40</sub> O <sub>15</sub> | 475.1833, 505.1740                                         | cistanoside D                                              | CDE     |
| 50 | 16.758 | 649.2148 | 0.31  | C <sub>31</sub> H <sub>38</sub> O <sub>15</sub> | 145.0295, 161.0243, 315.1059, 461.1665                     | salaside D or salaside F or tubuloside E or isomer         | CDE     |
| 51 | 16.876 | 591.2086 | -0.29 | C <sub>29</sub> H <sub>36</sub> O <sub>13</sub> | 161.0244                                                   | osmanthuside B or B6 or isomer                             | CDE/CTE |

|      |                    |          |           |                                                 |                       |                         |           |    |                |     |           |           |
|------|--------------------|----------|-----------|-------------------------------------------------|-----------------------|-------------------------|-----------|----|----------------|-----|-----------|-----------|
| 52   | 17.465             | 693.2395 | 0.51      | C <sub>33</sub> H <sub>42</sub> O <sub>16</sub> | 175.0406, 651.2285    | cistanoside J or isomer |           |    |                | CDE |           |           |
| CTE: | <i>C. tubulosa</i> | aqueous  | extracts; | CDE:                                            | <i>C. desertocola</i> | aqueous                 | extracts; | *: | identification | by  | reference | standards |

**Table S3** Validation results of LC–MS/MS method for detecting certain compounds in *C. deserticola* and *C. tubulosa* aqueous extracts

| Compound              | Linear regression equation | R <sup>2</sup> | Linear rang<br>(ng/mL) | LOD<br>(ng/mL) | LOQ<br>(ng/mL) | Precision (RSD %)  |                    | Reproducibility<br>(RSD%)<br>(n=6) | Stability<br>(RSD%)<br>(n=6) | Recovery (%) |
|-----------------------|----------------------------|----------------|------------------------|----------------|----------------|--------------------|--------------------|------------------------------------|------------------------------|--------------|
|                       |                            |                |                        |                |                | Intra–day<br>(n=6) | Inter–day<br>(n=6) |                                    |                              |              |
| Echinacoside          | Y=0.00876X–0.0178          | 0.9992         | 100–100000             | 0.1            | 0.5            | 3.12               | 3.26               | 2.38                               | 4.22                         | 93.1–103.5   |
| Geniposide acid       | Y=0.00332X–0.00062         | 0.9991         | 10–500                 | 0.3            | 1.0            | 2.79               | 3.17               | 4.21                               | 3.38                         | 92.4–102.3   |
| 8–Epiloganic acid     | Y=0.312X+0.000627          | 0.9997         | 1.5–2000               | 0.4            | 1.5            | 1.26               | 2.22               | 3.29                               | 2.35                         | 95.2–104.1   |
| Verbascoside          | Y=0.00512X–0.00371         | 0.9994         | 100–100000             | 0.5            | 1.0            | 2.01               | 3.25               | 4.23                               | 3.19                         | 93.9–102.4   |
| Isoverbascoside       | Y=0.302X–0.212             | 0.9993         | 100–20000              | 1.0            | 4.0            | 1.32               | 2.73               | 2.92                               | 4.27                         | 92.2–103.2   |
| 2’–Acetylverbsacoside | Y=0.602X–0.1032            | 0.9995         | 50–5000                | 0.5            | 1.0            | 2.75               | 3.21               | 3.17                               | 4.28                         | 93.4–101.6   |
| Campneoside II        | Y=0.272X+0.0027            | 0.9991         | 2–2000                 | 0.5            | 1.5            | 1.24               | 2.37               | 3.30                               | 3.19                         | 92.5–98.3    |
| Tubuloside B          | Y=0.0815X–0.00261          | 0.9999         | 10–1000                | 1.0            | 5.0            | 2.55               | 3.18               | 4.29                               | 3.27                         | 100.4–104.3  |
| Cistanoside A         | Y=0.0593X–0.00931          | 0.9999         | 10–1000                | 1.0            | 3.0            | 2.64               | 3.02               | 3.13                               | 4.02                         | 92.4–101.2   |

**Table S4** Linear regression equation, linear range, LLOQ of the analysts

| Analyst                           | Linear regression equation | R <sup>2</sup> | Linear rang (ng/mL) | LLOQ (ng/mL) |
|-----------------------------------|----------------------------|----------------|---------------------|--------------|
| Echinacoside                      | Y=0.127X-0.00127           | 0.9995         | 10–2000             | 10           |
| Geniposide acid                   | Y=0.202X-0.00283           | 0.9993         | 10–2000             | 10           |
| 8–Epiloganic acid                 | Y=0.427X-0.00315           | 0.9990         | 10–2000             | 10           |
| Verbascoside                      | Y=0.512X-0.00891           | 0.9992         | 10–2000             | 10           |
| Isoverbascoside                   | Y=0.0721X-0.0009           | 0.9991         | 10–2000             | 10           |
| 2' –Acetylverbsacside             | Y=0.32X-0.000736           | 0.9995         | 2–400               | 2            |
| Campneoside II                    | Y=0.483X+0.0291            | 0.9990         | 10–2000             | 10           |
| Tubuloside B                      | Y=0.019X-0.00461           | 0.9992         | 20–4000             | 20           |
| Cistanoside A                     | Y=0.00702X-0.0000321       | 0.9994         | 20–4000             | 20           |
| caffeic acid                      | Y=0.328X+0.139             | 0.9990         | 10–2000             | 10           |
| 3,4–dihydroxyphenylpropionic acid | Y=0.152X+0.0173            | 0.9991         | 10–2000             | 10           |
| 3–hydroxyphenylpropionic acid     | Y=0.651X+1.27              | 0.9990         | 10–2000             | 10           |
| hydroxytyrosol                    | Y=1.29X+0.028              | 0.9934         | 10–2000             | 10           |

**Table S5** Precision, repeatability and stability of the analysts

| Analyst                                | Intra-day RSD (% , n=6) |        |      | Inter-day RSD (% , n=6) |        |      | Repeatability | Stability |
|----------------------------------------|-------------------------|--------|------|-------------------------|--------|------|---------------|-----------|
|                                        | Low                     | Medium | High | Low                     | Medium | High | RSD (%)       | RSD (%)   |
| Echinacoside                           | 3.21                    | 4.28   | 3.43 | 4.17                    | 3.21   | 2.38 | 8.31          | 4.98      |
| Geniposide acid                        | 5.28                    | 3.20   | 2.31 | 3.91                    | 4.18   | 2.73 | 5.49          | 5.21      |
| 8-Epiloganic acid                      | 9.39                    | 4.19   | 2.32 | 10.23                   | 5.21   | 4.35 | 6.17          | 6.11      |
| Verbascoside                           | 8.34                    | 3.41   | 3.91 | 7.25                    | 4.11   | 3.74 | 3.28          | 4.65      |
| Isoverbascoside                        | 2.37                    | 2.38   | 3.23 | 2.48                    | 2.76   | 1.39 | 5.99          | 3.77      |
| 2'-Acetylverbsacoside                  | 3.28                    | 2.24   | 2.32 | 4.15                    | 3.29   | 3.15 | 6.06          | 6.01      |
| Campneoside II                         | 8.20                    | 4.91   | 5.39 | 6.94                    | 5.31   | 4.23 | 3.65          | 5.73      |
| Tubuloside B                           | 2.39                    | 2.32   | 1.32 | 2.38                    | 3.19   | 1.37 | 4.27          | 4.46      |
| Cistanoside A                          | 3.24                    | 2.17   | 3.21 | 3.39                    | 2.31   | 3.06 | 5.31          | 7.31      |
| caffeic acid                           | 12.33                   | 4.29   | 5.30 | 13.91                   | 4.28   | 3.53 | 7.05          | 8.92      |
| 3,4-dihydroxyphenyl-<br>propionic acid | 13.29                   | 8.21   | 3.21 | 14.29                   | 5.97   | 4.28 | 5.81          | 6.81      |
| 3-<br>hydroxyphenylpropionic           | 10.82                   | 4.27   | 4.26 | 11.65                   | 6.87   | 3.95 | 6.67          | 8.25      |

|                |      |      |      |      |      |      |      |      |
|----------------|------|------|------|------|------|------|------|------|
| acid           |      |      |      |      |      |      |      |      |
| hydroxytyrosol | 9.39 | 5.36 | 4.27 | 8.81 | 6.81 | 4.27 | 4.96 | 7.10 |

**Table S6** Recovery and matrix effects of the analysts

| Analyst               | Recovery (% , n=3) |      |        |      |        |      | Matrix effect |
|-----------------------|--------------------|------|--------|------|--------|------|---------------|
|                       | Low                |      | Medium |      | High   |      | SSE (%)       |
|                       | Mean               | RSD  | Mean   | RSD  | Mean   | RSD  |               |
| Echinacoside          | 105.28             | 5.09 | 98.72  | 2.36 | 103.01 | 2.78 | 84.21         |
| Geniposide acid       | 98.31              | 4.26 | 95.31  | 3.82 | 100.26 | 3.05 | 92.76         |
| 8–Epiloganic acid     | 87.07              | 3.42 | 91.38  | 4.11 | 94.99  | 4.65 | 110.82        |
| Verbascoside          | 102.24             | 6.90 | 105.10 | 2.27 | 102.64 | 3.53 | 89.92         |
| Isoverbascoside       | 88.21              | 4.36 | 102.67 | 3.91 | 97.31  | 2.65 | 90.92         |
| 2’–Acetylverbsacoside | 96.59              | 3.77 | 97.99  | 2.82 | 104.28 | 4.07 | 100.94        |
| Campneoside II        | 91.86              | 3.85 | 94.31  | 4.60 | 103.65 | 2.64 | 84.15         |
| Tubuloside B          | 89.17              | 4.26 | 92.66  | 5.28 | 110.90 | 3.45 | 88.27         |
| Cistanoside A         | 113.62             | 6.85 | 104.82 | 3.63 | 94.87  | 2.39 | 120.01        |

|                                        |        |       |        |      |        |      |        |
|----------------------------------------|--------|-------|--------|------|--------|------|--------|
| caffeic acid                           | 118.31 | 5.71  | 107.01 | 4.51 | 103.25 | 1.80 | 125.16 |
| 3,4-dihydroxyphenyl–<br>propionic acid | 105.72 | 3.05  | 102.48 | 3.85 | 96.92  | 2.31 | 104.92 |
| 3–<br>hydroxyphenylpropionic<br>acid   | 119.03 | 8.46  | 107.37 | 4.28 | 95.29  | 3.81 | 104.90 |
| hydroxytyrosol                         | 117.99 | 10.32 | 104.6  | 5.01 | 92.31  | 4.28 | 125.05 |

**Table S7** Information of 15 candidate bioactive compounds of CH

| No | Compound          | Structure                                                                            | Type                                 |
|----|-------------------|--------------------------------------------------------------------------------------|--------------------------------------|
| 1  | caffeic acid      | 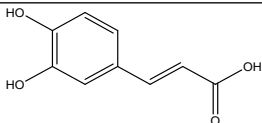  | Metabolite                           |
| 2  | 8-epiloganic acid | 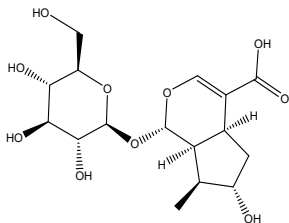 | prototype<br><br>(iridoid glycoside) |

3 Hydroxytyrosol

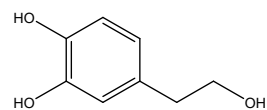

metabolite

4 tubuloside B

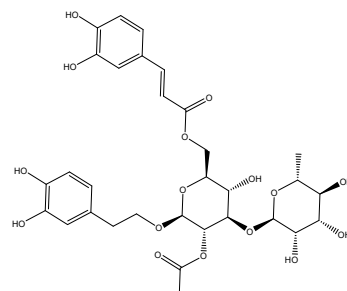

prototype

(phenylethanoid glycoside)

5 cistanoside A

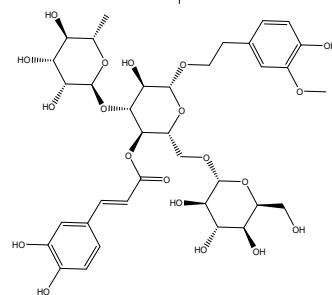

prototype

(phenylethanoid glycoside)

6 3-hydroxyphenylpropionic acid

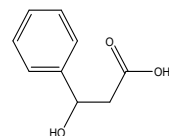

Metabolite

7 3,4-dihydroxyphenylpropionic acid

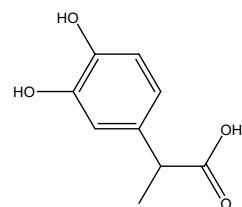

Metabolite

8 Echinacoside

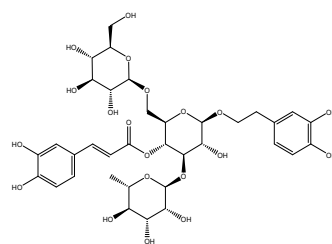

prototype

(phenylethanoid glycoside)

9 Verbascoside

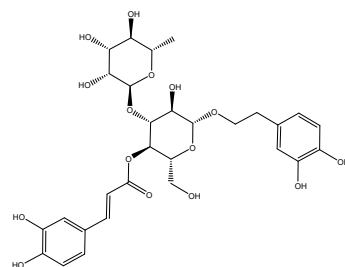

prototype

(phenylethanoid glycoside)

10 geniposidic acid

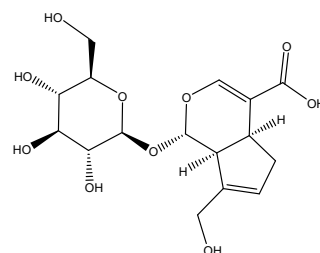

prototype

(iridoid glycoside)

11 2'-acetylverbascoside

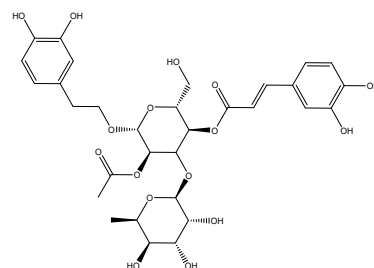

prototype

(phenylethanoid glycoside)

12 Isoverbascoside

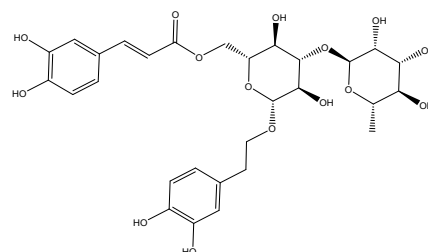

prototype

(phenylethanoid glycoside)

13 Salidroside

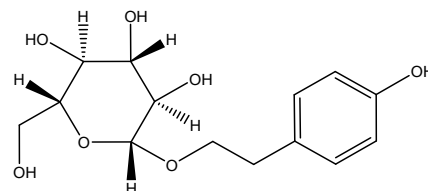

prototype

(phenylethanoid glycoside)

14 6-deoxycatalpol

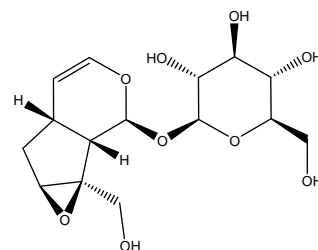

prototype

(iridoid glycoside)

15 campneoside II

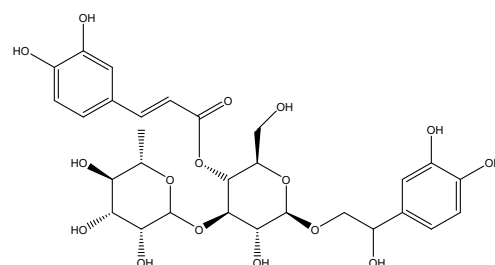

prototype

(iridoid glycoside)

**Table S8** Toxicity test results of each compound on PC12 cells (Mean  $\pm$  SD, n=6)

| Compound                          | Concentration<br>( $\mu$ M) | Cell viability<br>(%) | Compound                      | Concentration<br>( $\mu$ M) | Cell viability<br>(%) | Compound              | Concentration<br>( $\mu$ M) | Cell viability<br>(%) |
|-----------------------------------|-----------------------------|-----------------------|-------------------------------|-----------------------------|-----------------------|-----------------------|-----------------------------|-----------------------|
| Caffeic acid                      | 0                           | 96.7 $\pm$ 2.78       | 3-Hydroxyphenylpropionic acid | 0                           | 98.5 $\pm$ 1.67       | Hydroxytyrosol        | 0                           | 97.3 $\pm$ 2.54       |
|                                   | 6.25                        | 94.1 $\pm$ 1.26       |                               | 12.5                        | 95.2 $\pm$ 2.15       |                       | 12.5                        | 95.6 $\pm$ 1.23       |
|                                   | 12.5                        | 95.2 $\pm$ 1.90       |                               | 25                          | 87.3 $\pm$ 1.53       |                       | 25                          | 96.1 $\pm$ 2.42       |
|                                   | 25                          | 89.5 $\pm$ 2.62       |                               | 50                          | 79.4 $\pm$ 2.16       |                       | 50                          | 87.9 $\pm$ 1.26       |
|                                   | 50                          | 84.8 $\pm$ 3.54       |                               | 100                         | 70.6 $\pm$ 1.54       |                       | 100                         | 83.6 $\pm$ 1.07       |
| 3,4-dihydroxyphenylpropionic acid | 0                           | 97.3 $\pm$ 1.42       | tubuloside B                  | 0                           | 96.3 $\pm$ 2.04       | 2'-acetylverbascoside | 0                           | 98.6 $\pm$ 1.26       |
|                                   | 12.5                        | 93.3 $\pm$ 1.38       |                               | 12.5                        | 95.8 $\pm$ 2.51       |                       | 12.5                        | 95.2 $\pm$ 2.49       |
|                                   | 25                          | 92.9 $\pm$ 2.17       |                               | 25                          | 91.3 $\pm$ 1.28       |                       | 25                          | 94.3 $\pm$ 1.08       |
|                                   | 50                          | 87.6 $\pm$ 1.23       |                               | 50                          | 85.3 $\pm$ 1.55       |                       | 50                          | 86.4 $\pm$ 2.54       |
|                                   | 100                         | 79.2 $\pm$ 3.15       |                               | 100                         | 76.6 $\pm$ 2.38       |                       | 100                         | 76.2 $\pm$ 1.99       |
| verbascoside                      | 0                           | 98.1 $\pm$ 2.56       | geniposidic acid              | 0                           | 98.4 $\pm$ 1.54       | isoverbascoside       | 0                           | 98.1 $\pm$ 1.28       |
|                                   | 25                          | 97.0 $\pm$ 1.92       |                               | 25                          | 96.2 $\pm$ 2.15       |                       | 25                          | 96.3 $\pm$ 2.17       |
|                                   | 50                          | 94.9 $\pm$ 2.35       |                               | 50                          | 93.6 $\pm$ 1.03       |                       | 50                          | 93.2 $\pm$ 1.06       |

|                   |     |           |               |     |           |                |     |           |
|-------------------|-----|-----------|---------------|-----|-----------|----------------|-----|-----------|
| 6-deoxycatalpol   | 100 | 85.1±2.67 | salidroside   | 100 | 86.2±2.54 | campneoside II | 100 | 88.2±1.29 |
|                   | 200 | 75.2±2.15 |               | 200 | 79.3±1.26 |                | 200 | 79.6±1.05 |
|                   | 0   | 98.2±1.65 |               | 0   | 98.1±2.35 |                | 0   | 97.3±1.25 |
|                   | 25  | 96.9±2.16 |               | 25  | 95.6±1.27 |                | 25  | 96.1±2.53 |
|                   | 50  | 95.3±2.03 |               | 50  | 94.5±1.85 |                | 50  | 93.9±1.26 |
|                   | 100 | 88.7±1.28 |               | 100 | 86.3±1.33 |                | 100 | 87.2±1.58 |
|                   | 200 | 80.1±2.54 |               | 200 | 79.1±2.64 |                | 200 | 78.5±2.34 |
| 8-epiloganic acid | 0   | 98.2±1.45 | cistanoside A | 0   | 97.4±2.53 | echinacoside   | 0   | 96.2±2.51 |
|                   | 25  | 96.9±2.15 |               | 25  | 96.3±1.40 |                | 25  | 95.6±1.09 |
|                   | 50  | 93.5±1.27 |               | 50  | 94.2±2.16 |                | 50  | 93.3±2.65 |
|                   | 100 | 85.1±2.04 |               | 100 | 86.4±1.65 |                | 100 | 87.1±1.06 |
|                   | 200 | 75.9±1.32 |               | 200 | 77.6±2.15 |                | 200 | 78.2±1.24 |

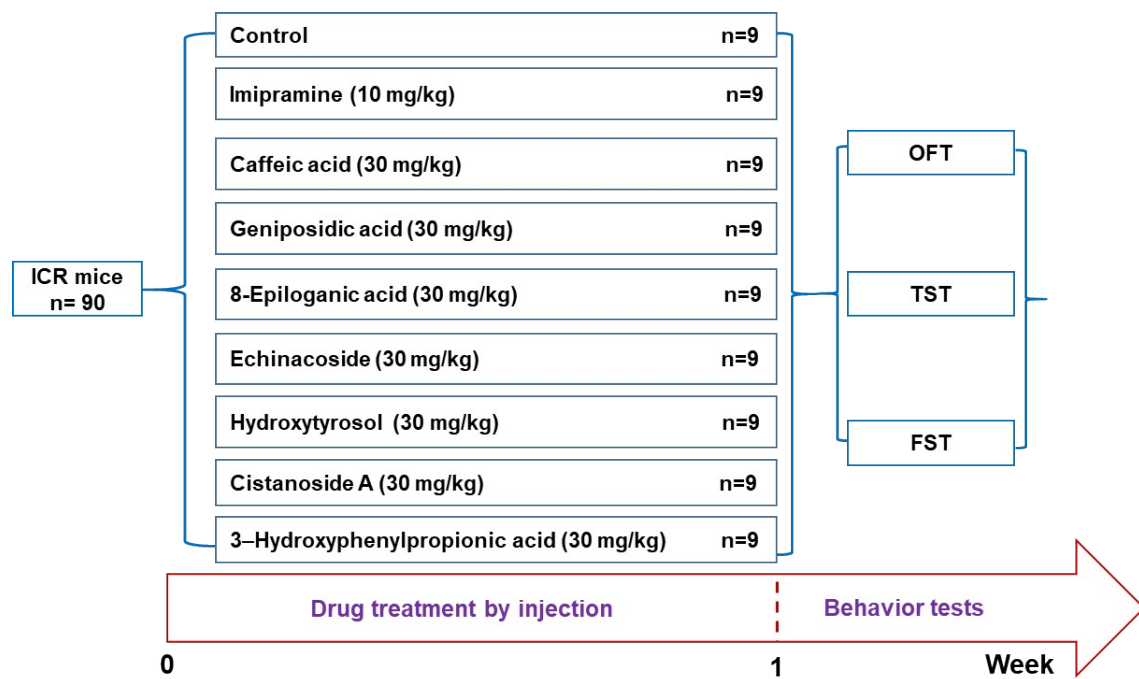

**Fig. S1** The flow chart of animal experiments for behavioral despair tests in mice

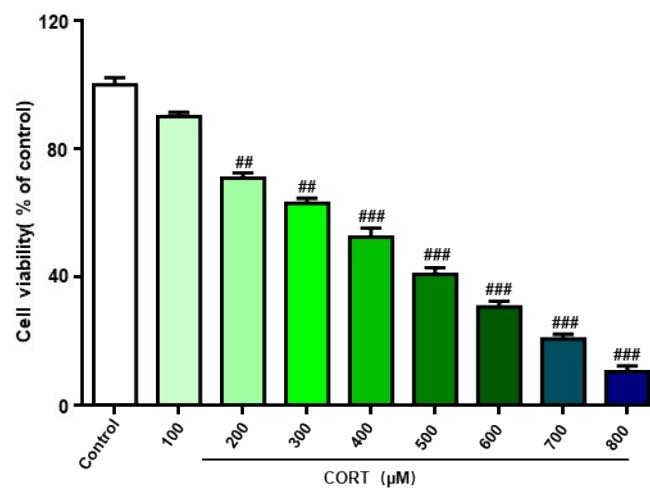

**Fig. S2** Cell viability of PC12 cells with co-incubation of corticosterone for 48 h
